# Supplementary material
Source: publisher figshare collection journal article supplement (https://acs.figshare.com/ndownloader/files/25526040)
Supplement: Supplementary file 1 [file 25526040]

Compound_ID	SMILES	Ki/rhMMP12 (nM)	Ki/mMMP12 (nM)	Ki/rhMMP2 (nM)	Ki/rhMMP7 (nM)	Ki/rhMMP9 (nM)	Ki/mMMP9 (nM)	Ki/rhMMP13 (nM)
CGA	O=C(NO)[C@@H](CCCO1)[C@@H](CC(C)C)C(N[C@H](C(O)=O)CC2=CC=C1C=C2)=O	1.1 ± 0.6	0.91	300 ± 81	39 ± 2.0	1101 ± 289	180	31 ± 12
CGA-1	O=C([C@H]([C@H]1CC(C)C)CCCOC(C=C2)=CC=C2C[C@@H](C(N[C@H](C(O)=O)CCC(O)=O)=O)NC1=O)NO	1.2 ± 0.1	1.5	396±28	14.6 ± 0.1	2107 ± 454	1497	89± 18
AGA	O=C(NO)C[C@@H](CC(C)C)C(N[C@H](C(O)=O)CC1=CC=CC=C1)=O	11.8 ± 1	2.1	164±43	323 ± 129	125± 14	261	11.8± 1
AGA-1	ONC(C[C@H](C(N[C@H](C(N[C@H](C(NCCNC(C1=CN=C(C=C1)NN)=O)=O)CCC(O)=O)=O)CC2=CC=CC=C2)=O)CC(C)C)=O	7.5± 1.4	1.7	222± 17	615± 53	1305± 204	869	78± 8
AGA-2	ONC(C[C@@H](CC(C)C)C(N[C@@H](CC1=CC=C(OCCNC(C2=CN=C(NN)C=C2)=O)C=C1)C(O)=O)=O)=O	8.9± 0.2	1	> 5µM	> 5µM	155± 14	1126	> 5µM
